# Supplementary material for: Frequency optimisation for entrainment of gamma waves via sound stimulation in older adults
Source: Research Square preprint supplement (doi:10.21203/rs.3.rs-7064869/v1), 2025-12-31
Supplement: Supplementary file 1 [file 7a67d9ded0bc23a3cb6f6c2f.docx]

**Supplementary Information**

***Supplementary analysis S1***

A Pearson correlation coefficient was calculated to evaluate the relationship between age and frequency of stimulation deemed optimal for entrainment. There was no significant correlation found between age and optimal frequency, *r*(16) = .245, *p* = .379.

Supplementary Figure S1 displays the correlation between participant age and optimal stimulation frequency for entrainment in the given range.

**Figure S1**

*Correlation between age and optimal frequency of stimulation for entrainment.*
